# Supplementary figures and images for: Retracted Article: Sauchinone inhibits high glucose-induced oxidative stress and apoptosis in retinal pigment epithelial cells
Source: Royal Society of Chemistry journal article supplement (doi:10.1039/c9ra02817j), 2019-01-01

**Supplementary Fig. 1.** Chemical structure of sauchinone.

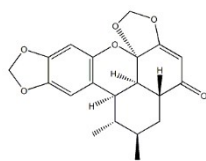

Supplement: c9ra02817j1.pdf [file c9ra02817j1.pdf]
